# Supplementary material
Source: MDPI journal article supplement (https://www.mdpi.com/2073-4344/12/5/479)
Supplement: s1 [file s1 › catalysts-1673317-supplementary.pdf]

*Supporting materials*

# **Silver-Carbonaceous Microsphere Precursor-Derived Nano-Coral Ag Catalyst for Electrochemical Carbon Dioxide Reduction**

**Xiangxiang Li, Shuling Chang, Yanting Wang and Lihong Zhang \***

Department of Catalysis Science and Technology and Tianjin Key Laboratory of Applied Catalysis Science & Technology, School of Chemical Engineering and Technology, Tianjin University, Tianjin 300350, China; lixx347@163.com (X.L.); csfq0818@163.com (S.C.); w2016016061@163.com (Y.W.)

\* Correspondence: zlh\_224@tju.edu.cn; Tel.: +86-150-2225-5828

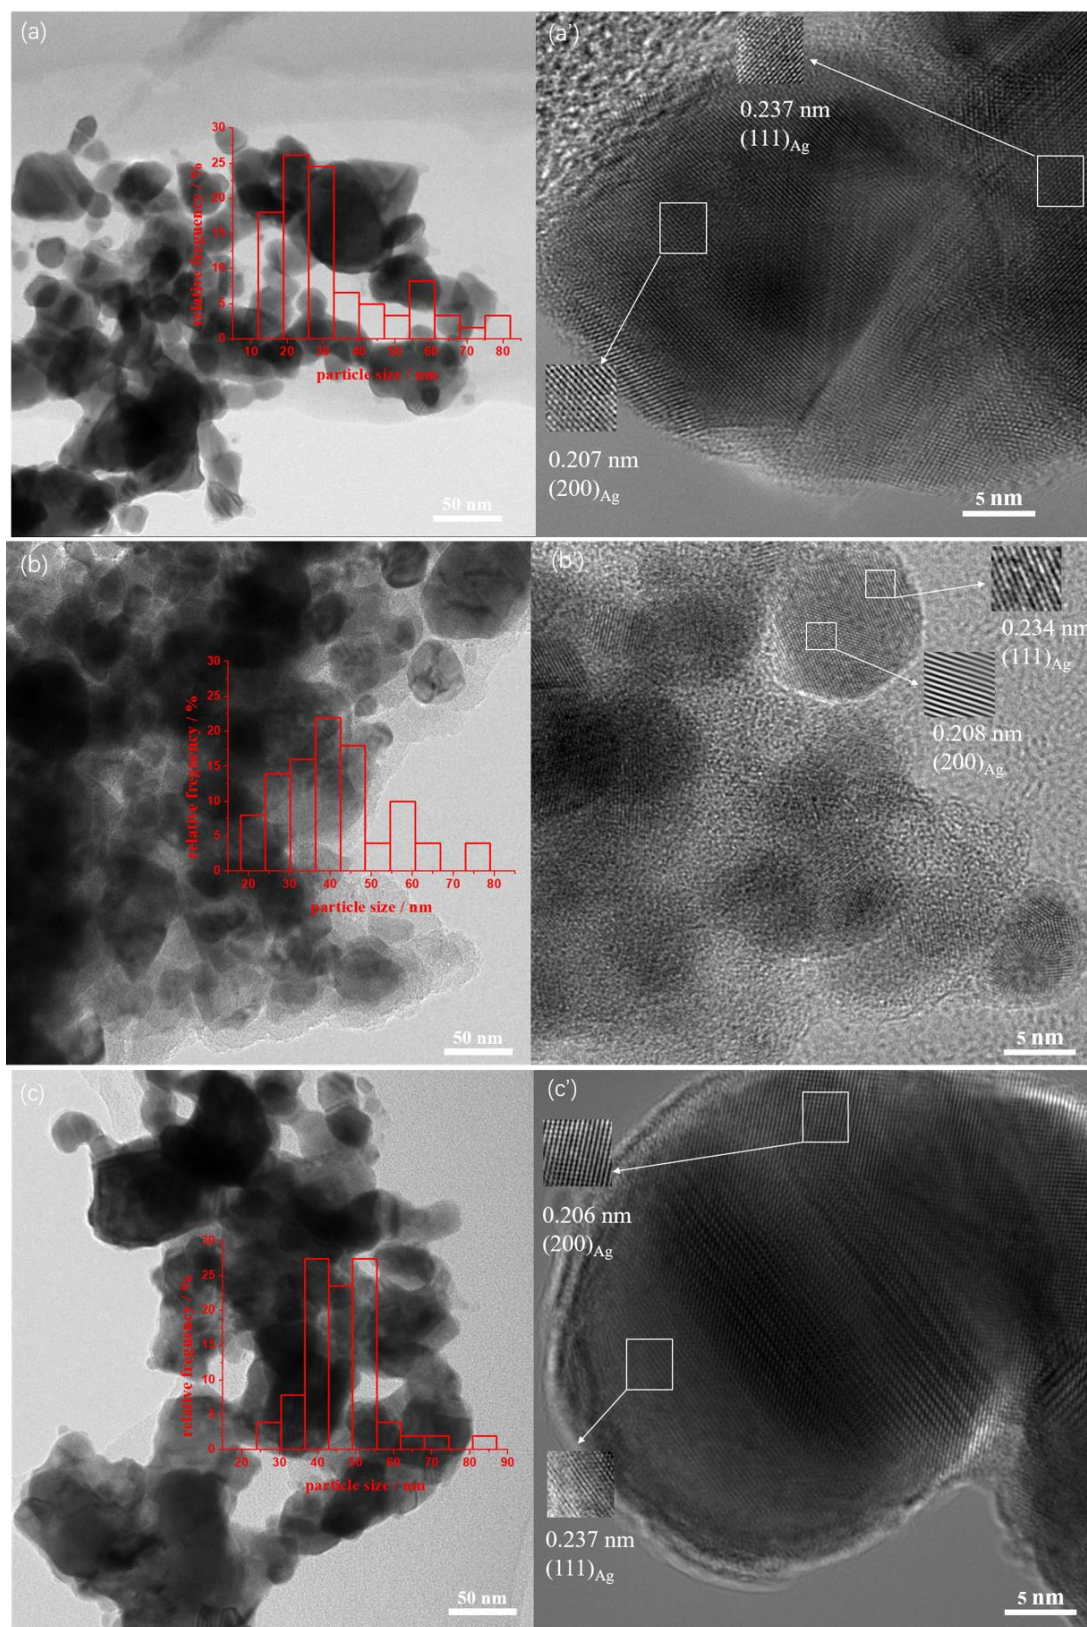

**Figure S1.** TEM image and the statistics of particle size distribution in inset (a, b, c) and HR-TEM (a', b', c') of different sample 10CD-Ag, 15CD-Ag and 20CD-Ag, respectively.

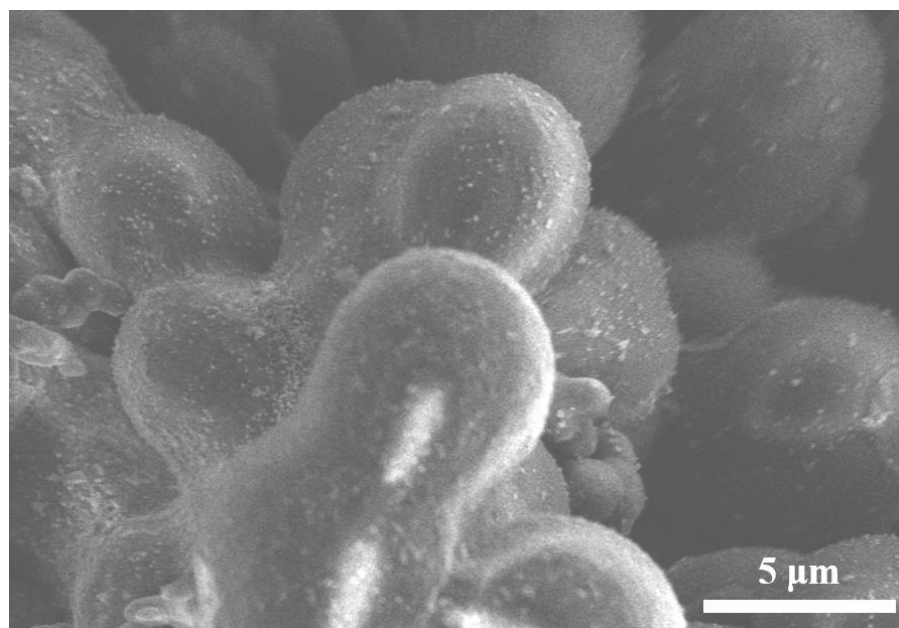

**Figure S2.** SEM image of the representative sample 15Ag/CM precursor.

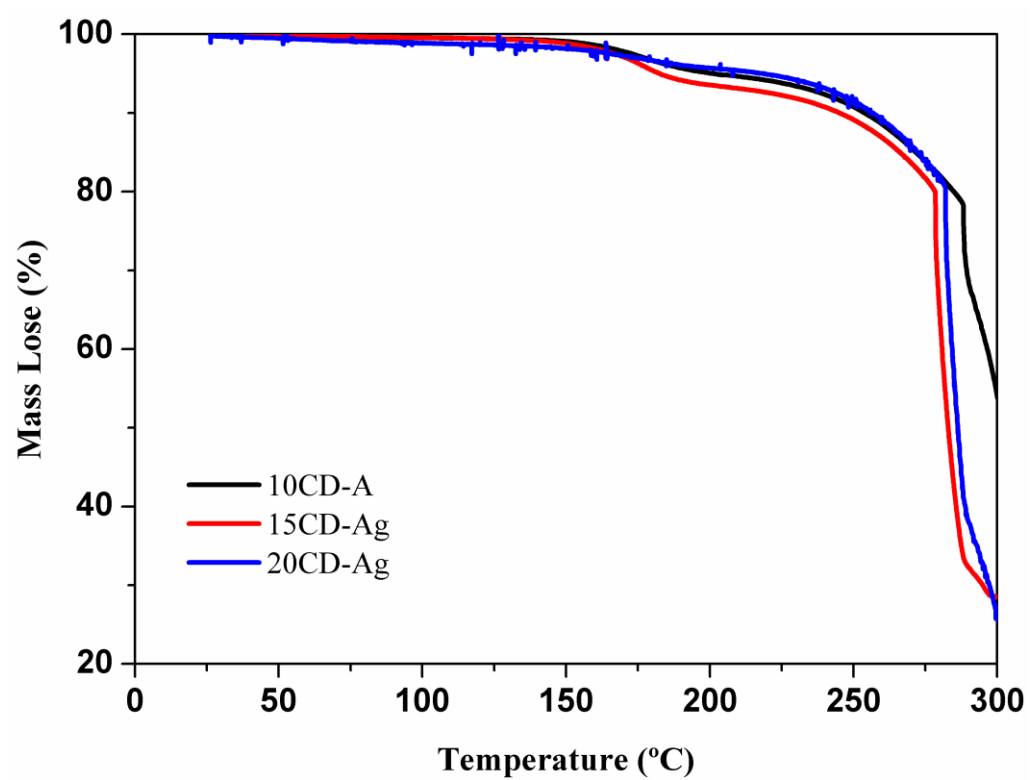

**Figure S3.** Thermogravimetric analysis (TG) profiles for the Ag/CM precursors during the calcination process.

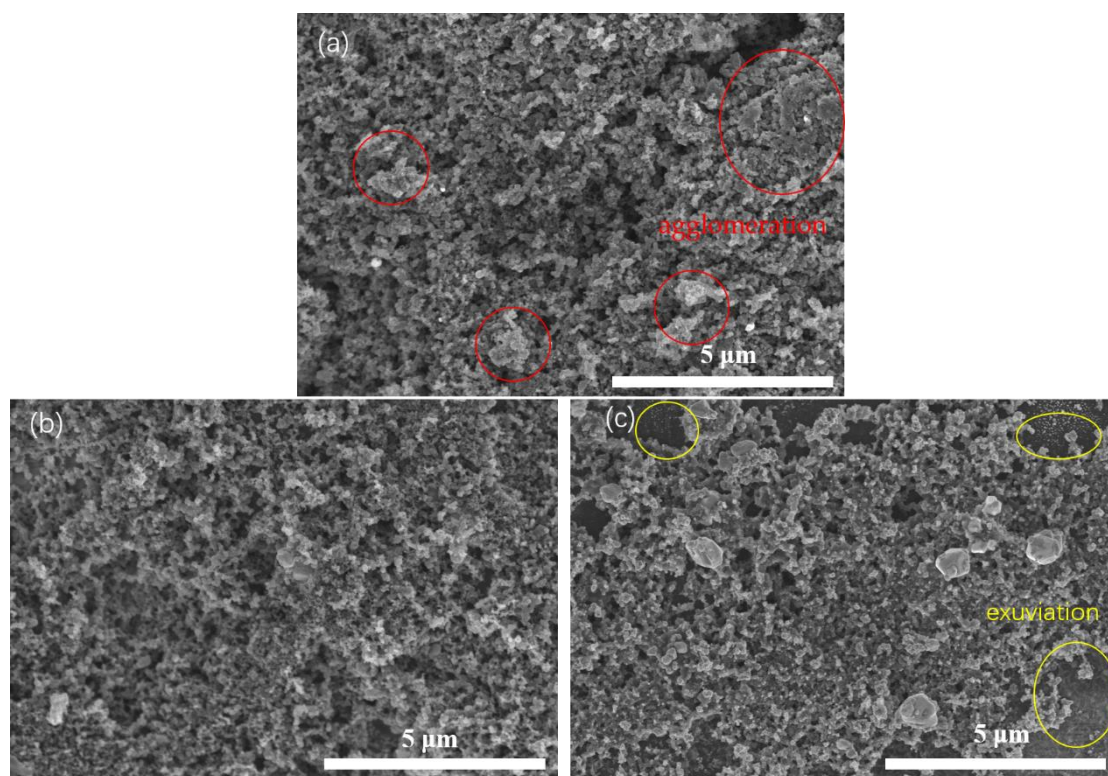

**Figure S4.** SEM images of different CD-Ag electrodes after 5 h electrolysis: (a) 10CD-Ag; (b) 15CD-Ag and (c) 20CD-Ag, respectively.

**Table S1.** The elemental compositions of three CD-Ag samples obtained from EDS.

| Elemental Compositions (wt%) | Sample  |         |         |
|------------------------------|---------|---------|---------|
|                              | 10CD-Ag | 15CD-Ag | 20CD-Ag |
| Ag                           | 98.7    | 97.6    | 96.3    |
| C                            | 0.6     | 1.4     | 2.7     |
| O                            | 0.7     | 1.0     | 1.0     |

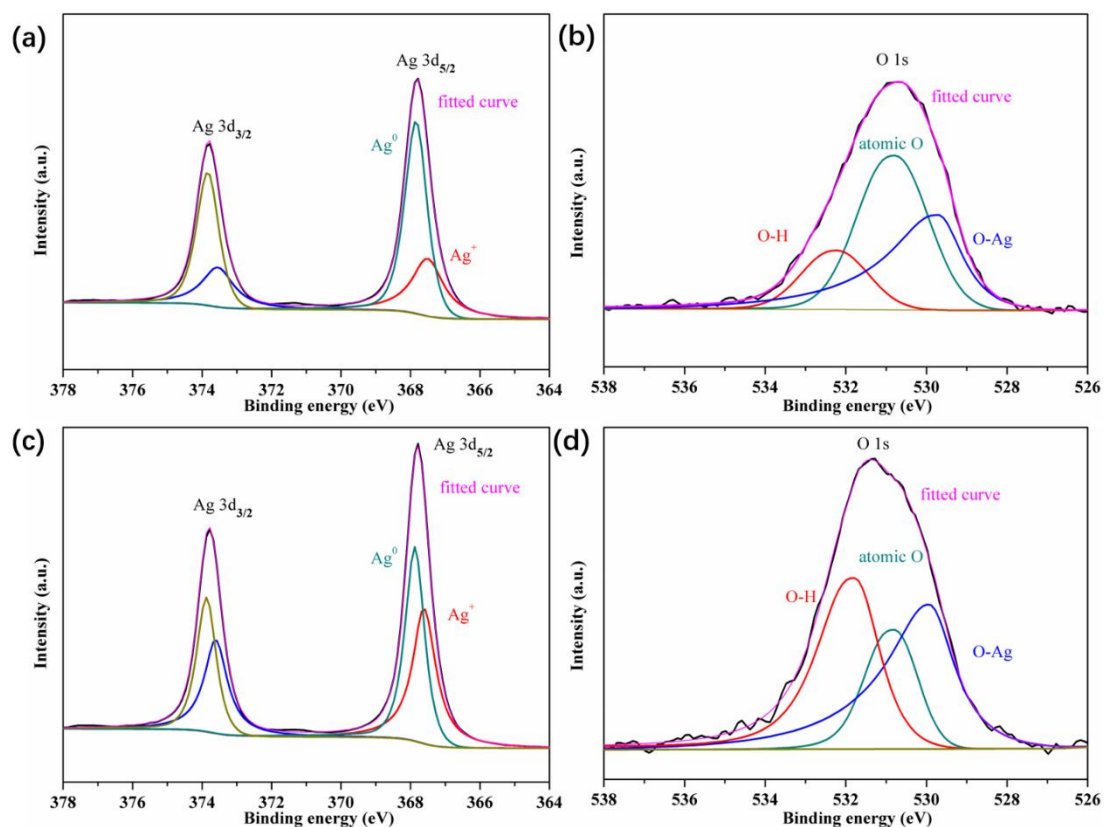

**Figure S5.** The deconvoluted peak of (a) Ag 3d and (b) O 1s of 10CD-Ag material and (c) Ag 3d and (d) O 1s of 20CD-Ag material.

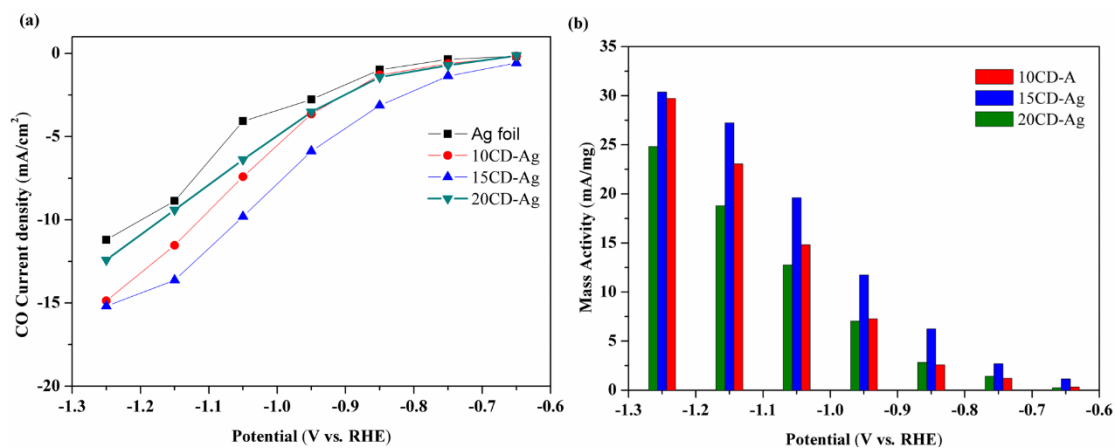

**Figure S6.** (a) CO partial current density depending on applied potential, and (b) mass activity depending on applied potential.

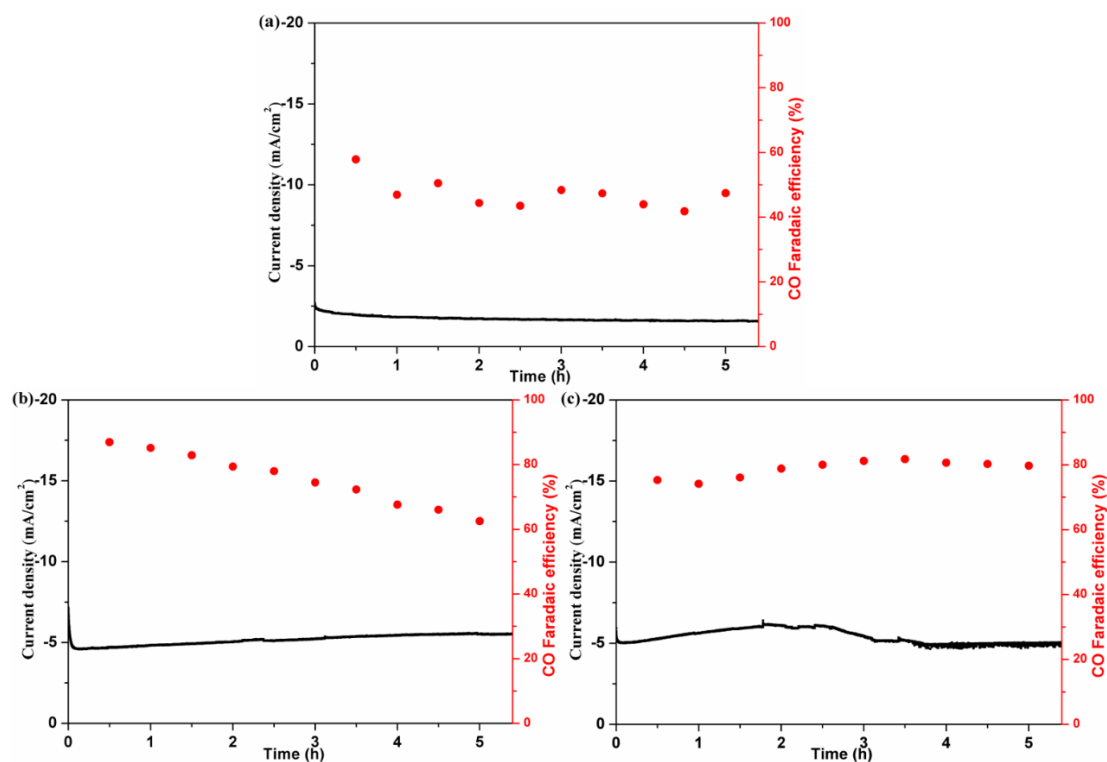

**Figure S7.** Current density and FE of CO during 5 h of long-time operation at -0.95 V vs. RHE for (a) Ag foil; (b) 10CD-Ag; (c) 20CD-Ag electrode, respectively.

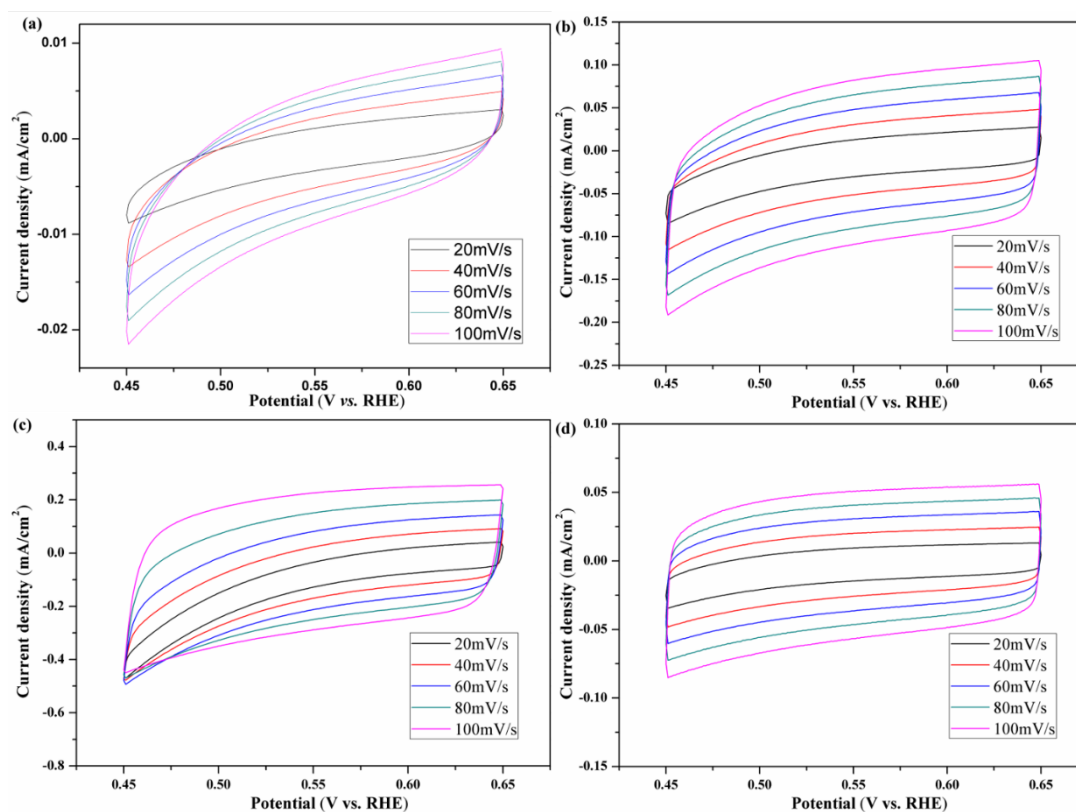

**Figure S8.** CV curves on (a) Ag foil; (b) 10CD-Ag; (c) 15CD-Ag; (d) 20CD-Ag electrode with a potential range from 0.65 to 0.45 V vs. RHE in a CO<sub>2</sub> bubbled 0.1 M KHCO<sub>3</sub> electrolyte.

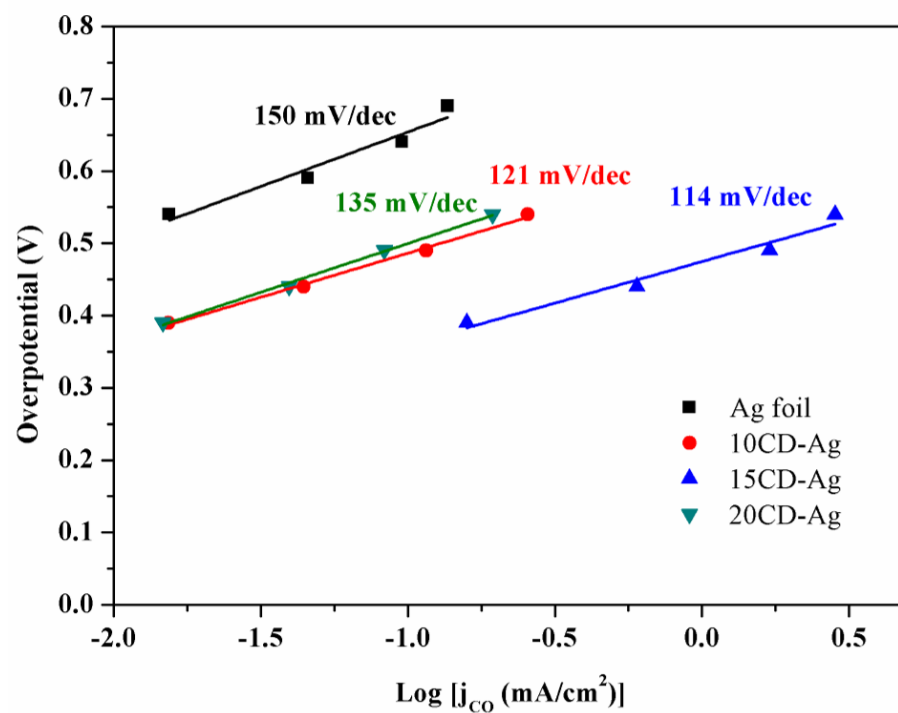

**Figure S9.** Tafel plots of the CO partial current density for Ag foil and CD-Ag.

**Table S2.** Comparison of catalytic performances of our catalyst with different Ag-based electrocatalysts producing CO in literatures.

| Catalyst         | Electrolyte              | Applied Potential (V vs. RHE) | Current Density (mA cm <sup>-2</sup> ) | Faradaic Efficiency (%) | Stability (h) | Ref       |
|------------------|--------------------------|-------------------------------|----------------------------------------|-------------------------|---------------|-----------|
| OD Ag            | 0.1 M KHCO <sub>3</sub>  | -0.80                         | 1.15                                   | 89                      | 2             | [23]      |
| Ag nano-corals   | 0.1 M KHCO <sub>3</sub>  | -0.60                         | 2                                      | 95                      | 72            | [25]      |
| AE-Ag            | 0.1 M KHCO <sub>3</sub>  | -0.55                         | 1                                      | 90                      | 37            | [44]      |
| Ag Nanowires     | 0.5 M KHCO <sub>3</sub>  | -0.90                         | 7.1                                    | 78                      | 12            | [27]      |
| Hollow porous Ag | 0.5 M NaHCO <sub>3</sub> | -0.845                        | 3                                      | 94                      | 10            | [40]      |
| Tri-Ag-NPs       | 0.1 M KHCO <sub>3</sub>  | -0.856                        | 1.25                                   | 96                      | 14            | [45]      |
| Air-Ag           | 0.1 M KHCO <sub>3</sub>  | -0.86                         | 13.2                                   | 80                      | 2.7           | [33]      |
| H-Ag             | 0.1 M KHCO <sub>3</sub>  | -0.93                         | 4.92                                   | 89.4                    | 4             | [41]      |
| 15CD-Ag          | 0.1 M KHCO <sub>3</sub>  | -0.95                         | 6.3                                    | 89.7                    | 5             | This work |
| 15CD-Ag          | 0.1 M KHCO <sub>3</sub>  | -1.15                         | 14.4                                   | 94.9                    | /             | This work |
